# Supplementary material
Source: PubMed Central journal article supplement (PMC4499842)
Supplement: Supp_Figure2.pdf [file Supp_Figure2.pdf]

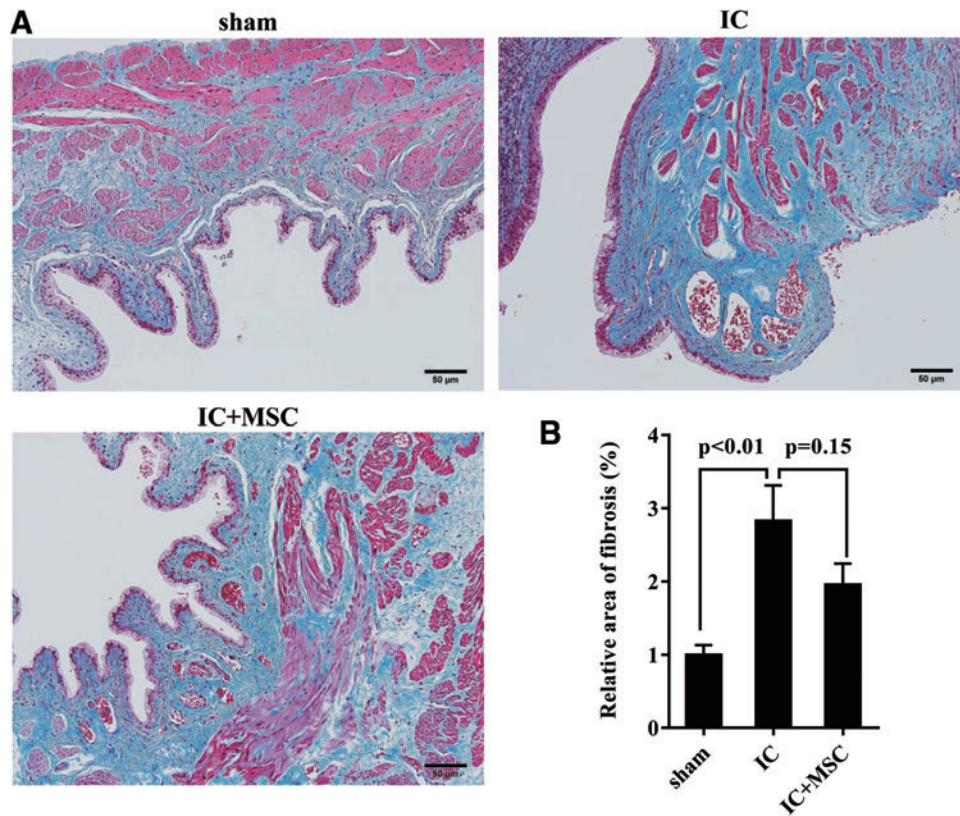

**SUPPLEMENTARY FIG. S2.** Fibrotic changes in the IC bladder. (A) Masson's trichrome staining in the indicated bladder tissues (magnification  $\times 200$ ). (B) Fold change of the area stained with Masson's trichrome is depicted as the mean  $\pm$  SEM ( $n \geq 5$ ;  $P < 0.01$  in comparison with IC group bladders, one-way ANOVA with Bonferroni post-test).
