# Supplementary material
Source: PubMed Central journal article supplement (PMC4499842)
Supplement: Supp_Figure3.pdf [file Supp_Figure3.pdf]

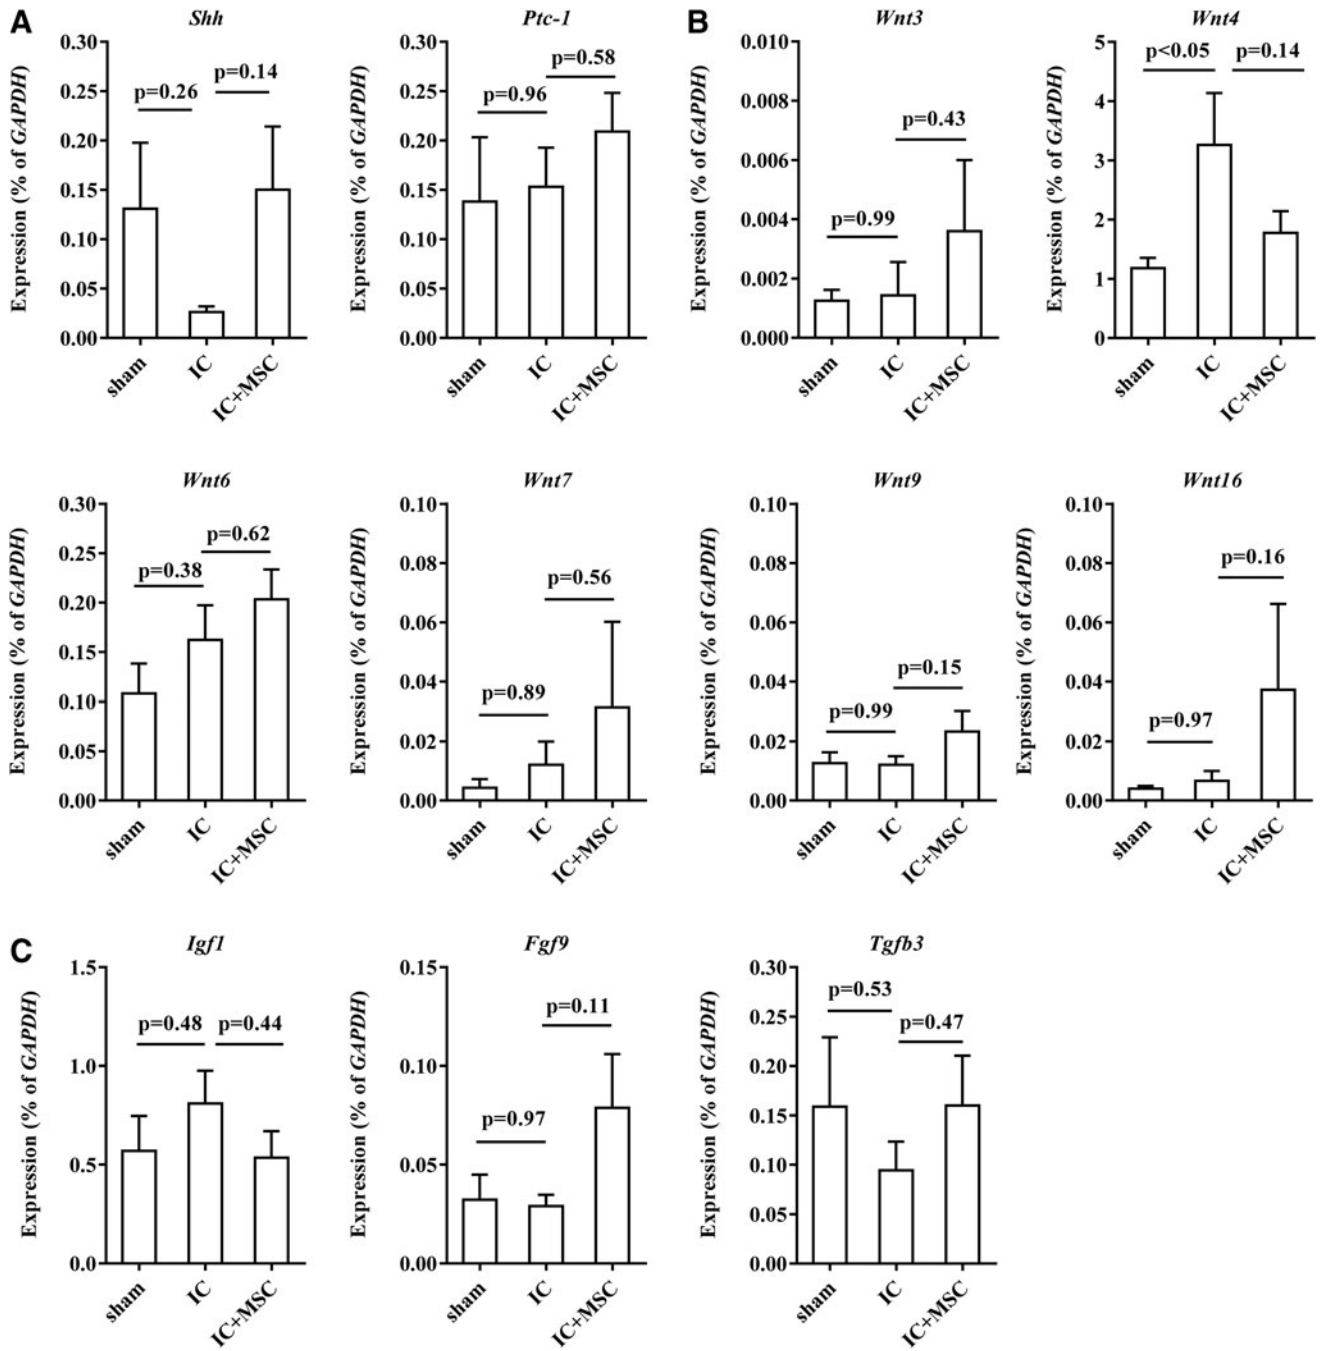

**SUPPLEMENTARY FIG. S3.** RQ-PCR analysis of (A) *Shh*, (B) *Wnt*, and (C) downstream growth factors in the indicated bladder tissues. The expression level is represented as % *Gapdh* (as determined using five or more independent experiments) and is shown as the mean  $\pm$  SEM ( $P < 0.05$  in comparison with IC group bladders, one-way ANOVA with Bonferroni post-test).
