# Supplementary material
Source: PubMed Central journal article supplement (PMC4499842)
Supplement: Supp_Figure4.pdf [file Supp_Figure4.pdf]

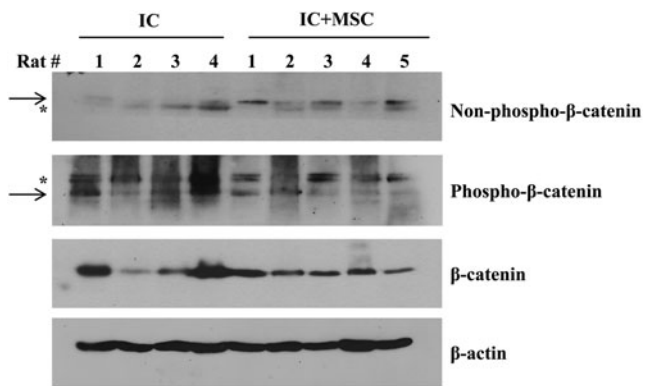

**SUPPLEMENTARY FIG. S4.** Western blot analysis of non-phospho β-catenin, phospho β-catenin (Ser33/37/Thr41), and total β-catenin proteins in the bladder tissues in the IC and IC+MSC groups. β-actin was used to normalize the loading amount. The *arrow* and *asterisk* indicate the right band of non-phospho or phospho β-catenin and the nonspecific band, respectively.
