# Supplementary material
Source: PubMed Central journal article supplement (PMC4499842)
Supplement: Supp_Figure5.pdf [file Supp_Figure5.pdf]

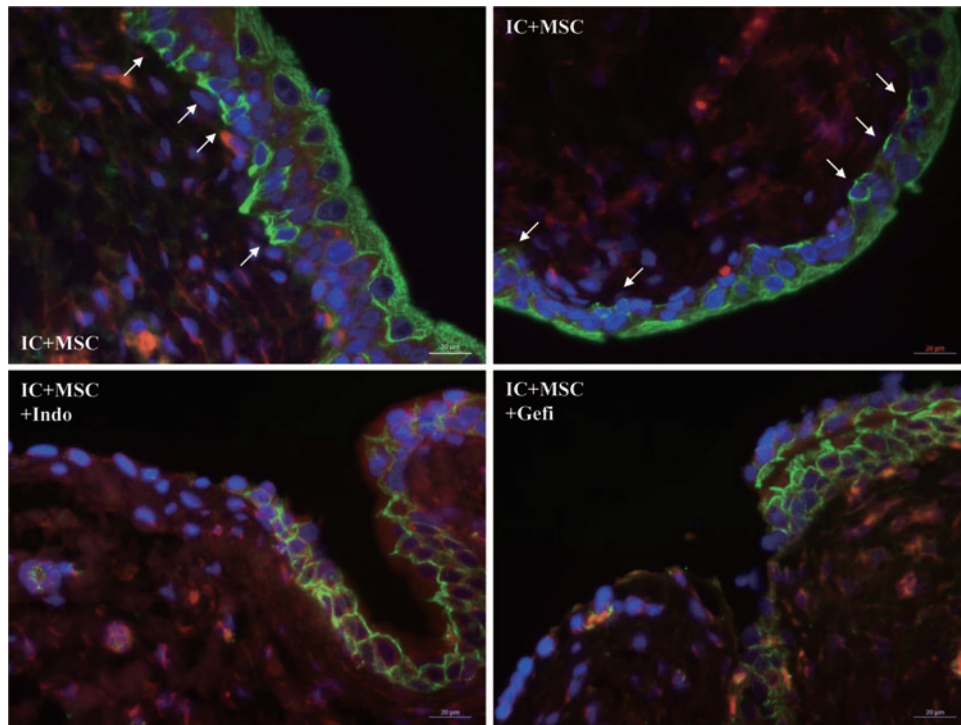

**SUPPLEMENTARY FIG. S5.** Fluorescent immunostaining of non-phospho  $\beta$ -catenin protein (*green*) at 1 week after the injection of PKH26-labeled UCB-MSCs (*red*) in the absence or presence of inhibitors (magnification  $\times 400$ ). Nuclei were stained with DAPI (*blue*). *Arrows* indicated positively stained regions. DAPI, 4',6-diamino-2-phenylindole; Gef, Gefitinib; Indo, indomethacin; UCB-MSC, umbilical cord-blood derived mesenchymal stem cell. Scale bar = 20  $\mu$ m.
