# Supplementary material
Source: PubMed Central journal article supplement (PMC4499842)
Supplement: Supp_Figure6.pdf [file Supp_Figure6.pdf]

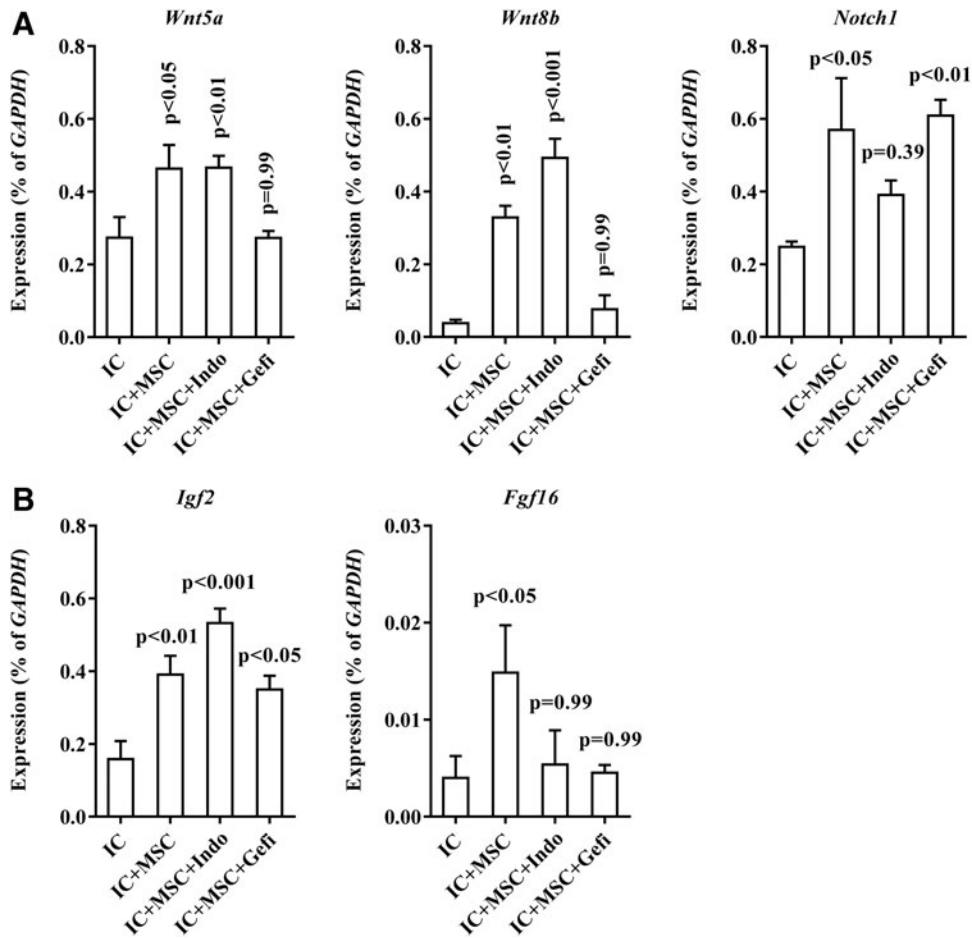

**SUPPLEMENTARY FIG. S6.** RQ-PCR analysis of the (A) *Wnt*, *Igf2*, and *Fgf16* (B) genes in the indicated bladder tissues. The expression level in the indicated bladder tissues is represented as % *Gapdh* (as determined using five or more independent experiments) and is shown as the mean  $\pm$  SEM ( $P < 0.05$ ,  $P < 0.01$  in comparison with IC group bladders, one-way ANOVA with Bonferroni post-test).
