# Supplementary material
Source: PubMed Central journal article supplement (PMC4499842)
Supplement: Supp_Figure7.pdf [file Supp_Figure7.pdf]

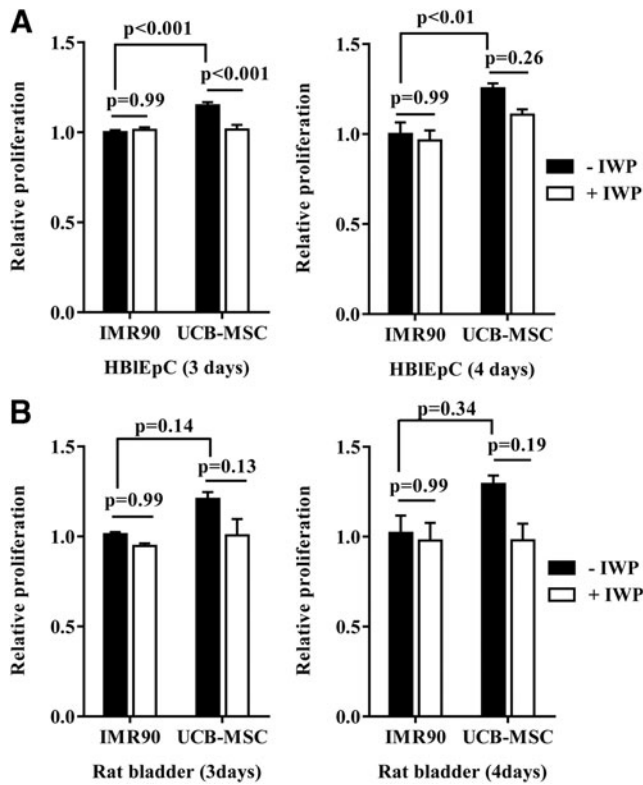

**SUPPLEMENTARY FIG. S7.** Cell proliferation analysis of primary epithelial cells from human (**A**) or rat (**B**) bladders after treatment with CM from IMR90 or UCB-MSCs for the indicated days. Reduction of the MTT reagent was quantified by measuring the absorbance at 570 nm. Thirty micromolars of IWP was used to inhibit the production of Wnt. The proliferation relative to IMR90 without IWP is shown as the mean  $\pm$  SEM [ $n=5$  (**A**) or  $n=3$  (**B**),  $P<0.01$  in comparison between indicated groups, two-way ANOVA with Bonferroni post-test]. CM, conditioned medium; HBIEpC, a primary human bladder epithelial cell; IMR90, normal human fibroblast; IWP, inhibitor of Wnt product.
