# Supplementary material
Source: PubMed Central journal article supplement (PMC4499842)
Supplement: Supp_Figure8.pdf [file Supp_Figure8.pdf]

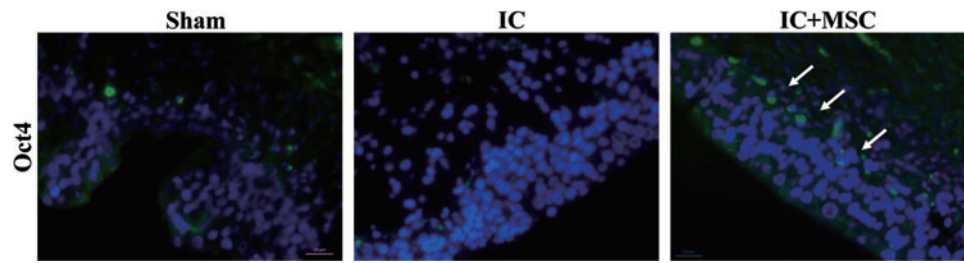

**SUPPLEMENTARY FIG. S8.** Fluorescent immunostaining of Oct4 protein (*green*) in the indicated bladder tissues (magnification  $\times 400$ ). Nuclei were stained with DAPI (*blue*). Of note, the dense staining of the Oct4 protein was mainly detected in the basal layer of the urothelium, specifically in the bladders of the IC+MSC group (*arrow*).
